# Supplementary material for: Identification of a New Antimicrobial, Desertomycin H, Utilizing a Modified Crowded Plate Technique
Source: MDPI journal article supplement (doi:10.3390/md19080424), 2021-07-27
Supplement: s1 [file s1]

## **Identification of a New Antimicrobial, Desertomycin H, Utilizing a Modified Crowded Plate Technique**

Osama G. Mohamed<sup>1,2,3</sup>, Sadaf Dorandish<sup>4</sup>, Rebecca Lindow<sup>4</sup>, Megan Steltz<sup>4</sup>, Ifrah Shoukat<sup>4</sup>, Maira Shoukat<sup>4</sup>, Hussein Chehade<sup>4</sup>, Sara Baghdadi<sup>4</sup>, Madelaine McAlister-Raeburn<sup>4,5</sup>, Asad Kamal<sup>4,6</sup>, Dawit Abebe<sup>4</sup>, Khaled Ali<sup>4</sup>, Chelsey Ivy<sup>4</sup>, Maria Antonova<sup>4</sup>, Pamela Schultz<sup>1,2</sup>, Michael Angell<sup>4</sup>, Daniel Clemans<sup>4</sup>, Timothy Friebe<sup>7</sup>, David Sherman<sup>2,8</sup>, Anne M. Casper<sup>4</sup>, Paul A. Price<sup>4\*</sup>, Ashootosh Tripathi<sup>1,2,8\*</sup>

<sup>1</sup> Natural Products Discovery Core, Life Sciences Institute, University of Michigan, Ann Arbor, Michigan 48109, USA

<sup>2</sup> Life Sciences Institute, University of Michigan, Ann Arbor, Michigan 48109, USA

<sup>3</sup> Pharmacognosy Department, Faculty of Pharmacy, Cairo University, Kasr el-Aini street, Cairo 11562, Egypt

<sup>4</sup> Biology Department, Eastern Michigan University, Ypsilanti, Michigan 48197, USA

<sup>5</sup> Biological Sciences, Mount Holyoke College, South Hadley, Massachusetts 01075, USA

<sup>6</sup> Biological Sciences, Wayne State University, Detroit, Michigan 48202, USA

<sup>7</sup> Chemistry Department, Eastern Michigan University, Ypsilanti, Michigan 48197, USA

<sup>8</sup> Department of Medicinal Chemistry, College of Pharmacy, University of Michigan, Ann Arbor, Michigan 48109, USA

**KEYWORDS** (antibiotic discovery, crowded plate technique, ESKAPE Pathogens, natural products, Tiny Earth<sup>®</sup>)

Corresponding authors.

\*Ashootosh Tripathi, Life Sciences Institute, University of Michigan, 210 Washtenaw Avenue, Ann Arbor, Michigan 48109, USA. Email: ashtri@umich.edu; Paul Price, Biology Department, Eastern Michigan University, 441 Mark Jefferson, Ypsilanti, Michigan, 48197, USA. Email: pprice5@emich.edu

## Table of Contents:

|    |                                                                      |    |
|----|----------------------------------------------------------------------|----|
| 1. | Comparison of antibiotic discovery methods .....                     | 3  |
| 2. | Comparison of media type for the mCPT method .....                   | 3  |
| 3. | Secondary Zone of Inhibition for <i>Streptomyces</i> sp. PAP62 ..... | 4  |
| 4. | Spectroscopic characterisation of desertomycin A (1) .....           | 5  |
| 5. | Spectroscopic characterisation of desertomycin H (2) .....           | 11 |
| 6. | Desertomycin A and desertomycin H bioactivity .....                  | 16 |
| 7. | References:.....                                                     | 16 |

## List of Figures

|                                                                                                                                                                                                                                                                                                                                                                                                                                                                                                  |    |
|--------------------------------------------------------------------------------------------------------------------------------------------------------------------------------------------------------------------------------------------------------------------------------------------------------------------------------------------------------------------------------------------------------------------------------------------------------------------------------------------------|----|
| Figure S1. Natural Product Extract (NPE) testing for <i>Streptomyces</i> sp. PAP62 using a drug-sensitive strain of <i>S. aureus</i> . (Left to Right) NPEs for <i>Streptomyces</i> sp. PAP62 grown in A3M (62-ASM) alone or with <i>C. glutamicum</i> (62-Corny), <i>M. smegmatis</i> (62-Myco), or <i>R. erythropolis</i> (62-Rhodo). The primary zone of inhibition on day one is denoted by the black lines. TYME plates were incubated at 37 °C and imaged at 3 days post-inoculation. .... | 4  |
| Figure S2. <sup>1</sup> H NMR (800 MHz, methanol- <i>d</i> <sub>4</sub> ) spectrum for desertomycin A (1).....                                                                                                                                                                                                                                                                                                                                                                                   | 5  |
| Figure S3. <sup>13</sup> C NMR (200 MHz, methanol- <i>d</i> <sub>4</sub> ) spectrum for desertomycin A (1).....                                                                                                                                                                                                                                                                                                                                                                                  | 5  |
| Figure S4. 2D NMR HSQC spectrum (methanol- <i>d</i> <sub>4</sub> ) for desertomycin A (1).....                                                                                                                                                                                                                                                                                                                                                                                                   | 6  |
| Figure S5. 2D NMR HMBC spectrum (methanol- <i>d</i> <sub>4</sub> ) for desertomycin A (1) .....                                                                                                                                                                                                                                                                                                                                                                                                  | 7  |
| Figure S6. 2D NMR COSY spectrum (methanol- <i>d</i> <sub>4</sub> ) for desertomycin A (1).....                                                                                                                                                                                                                                                                                                                                                                                                   | 8  |
| Figure S7. <sup>1</sup> H NMR (800 MHz, methanol- <i>d</i> <sub>4</sub> ) spectrum for desertomycin H (2).....                                                                                                                                                                                                                                                                                                                                                                                   | 11 |
| Figure S8. <sup>13</sup> C NMR (200 MHz, methanol- <i>d</i> <sub>4</sub> ) spectrum for desertomycin H (2).....                                                                                                                                                                                                                                                                                                                                                                                  | 11 |
| Figure S9. 2D NMR HSQC spectrum (methanol- <i>d</i> <sub>4</sub> ) for desertomycin H (2).....                                                                                                                                                                                                                                                                                                                                                                                                   | 12 |
| Figure S10. 2D NMR HMBC spectrum (methanol- <i>d</i> <sub>4</sub> ) for desertomycin H (2) .....                                                                                                                                                                                                                                                                                                                                                                                                 | 13 |
| Figure S11. 2D NMR COSY spectrum (methanol- <i>d</i> <sub>4</sub> ) for desertomycin H (2).....                                                                                                                                                                                                                                                                                                                                                                                                  | 14 |
| Figure S12. Desertomycin A and H bioactivity testing. (A) 30 µg of desertomycin A (A) and H (H) were tested for activity using a drug-sensitive strain of <i>S. aureus</i> and (B) a vancomycin intermediate-sensitive <i>S. aureus</i> (VISA5). DMSO (D) was used as a solvent control. TYME plates were incubated at 37 °C and imaged at 24 hours post-inoculation.....                                                                                                                        | 16 |

## List of Tables

|                                                                                                                                                                                                                                                                                                                                                                  |    |
|------------------------------------------------------------------------------------------------------------------------------------------------------------------------------------------------------------------------------------------------------------------------------------------------------------------------------------------------------------------|----|
| Table S1 Efficiency of the modified crowded plate technique (mCPT). Comparison of isolation techniques for identifying antibiotic producers effective against <i>B. subtilis</i> using the spread-patch assay: random selection, selection of <i>Streptomyces</i> sp., Waksman's crowded plate technique (CPT), and modified crowded plate technique (mCPT)..... | 3  |
| Table S2. Effect of media type on the mCPT. Representative experiment of the number of zones of inhibition observed over time on various types of media using D-alanine auxotrophic strains of <i>E. coli</i> or <i>B. subtilis</i> as target organisms over 2 agar plates.....                                                                                  | 3  |
| Table S3. 1D and 2D NMR (800 MHz, methanol- <i>d</i> <sub>4</sub> ) data for desertomycin A (1).....                                                                                                                                                                                                                                                             | 9  |
| Table S4. <sup>13</sup> C NMR (DMSO- <i>d</i> <sub>6</sub> ) data comparison of desertomycin A (1) with published data [1].....                                                                                                                                                                                                                                  | 10 |
| Table S5. 1D and 2D NMR (800 MHz, methanol- <i>d</i> <sub>4</sub> ) data for desertomycin H (2).....                                                                                                                                                                                                                                                             | 15 |

## 1. Comparison of antibiotic discovery methods

**Table S1** Efficiency of the modified crowded plate technique (mCPT). Comparison of isolation techniques for identifying antibiotic producers effective against *B. subtilis* using the spread-patch assay: random selection, selection of *Streptomyces* sp., Waksman's crowded plate technique (CPT), and modified crowded plate technique (mCPT).

| Screening method            | Number screened | Number of producers | Efficiency (%) |
|-----------------------------|-----------------|---------------------|----------------|
| Random                      | 210             | 13                  | 6.2%           |
| Streptomycete isolation     | 100             | 18                  | 18%            |
| CPT                         | 250             | 62                  | 25%            |
| mCPT ( <i>B. subtilis</i> ) | 100             | 75                  | 75%            |

## 2. Comparison of media type for the mCPT method

**Table S2.** Effect of media type on the mCPT. Representative experiment of the number of zones of inhibition observed over time on various types of media using D-alanine auxotrophic strains of *E. coli* or *B. subtilis* as target organisms over 2 agar plates.

| Medium  | Target organism    | Time  |       |       |        |        |
|---------|--------------------|-------|-------|-------|--------|--------|
|         |                    | Day 1 | Week1 | Week2 | Week 3 | Week 4 |
| TY      | <i>E. coli</i>     | 0     | 0     | 0     | 0      | 1      |
|         | <i>B. subtilis</i> | 0     | 0     | 0     | 0      | 0      |
| 10% TSA | <i>E. coli</i>     | 0     | 0     | 0     | 0      | 0      |
|         | <i>B. subtilis</i> | 0     | 2     | 2     | 2      | 2      |
| MYM     | <i>E. coli</i>     | 0     | 4     | 4     | 4      | 5      |
|         | <i>B. subtilis</i> | 0     | 0     | 0     | 2      | 3      |
| R2A     | <i>E. coli</i>     | 0     | 2     | 4     | 4      | 4      |
|         | <i>B. subtilis</i> | 0     | 0     | 0     | 3      | 3      |
| TYME    | <i>E. coli</i>     | 0     | 8     | 9     | 12     | 13     |
|         | <i>B. subtilis</i> | 0     | 3     | 4     | 8      | 8      |

### 3. Secondary Zone of Inhibition for *Streptomyces* sp. PAP62

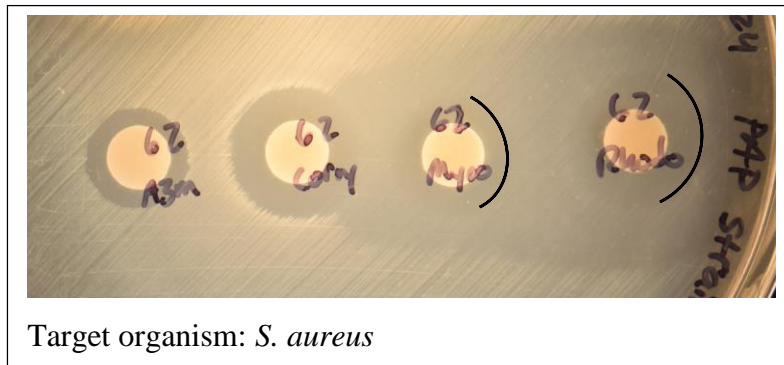

**Figure S1.** Natural Product Extract (NPE) testing for *Streptomyces* sp. PAP62 using a drug-sensitive strain of *S. aureus*. (Left to Right) NPEs for *Streptomyces* sp. PAP62 grown in A3M (62-ASM) alone or with *C. glutamicum* (62-Corny), *M. smegmatis* (62-Myco), or *R. erythropolis* (62-Rhodo). The primary zone of inhibition on day one is denoted by the black lines. TYME plates were incubated at 37 °C and imaged at 3 days post-inoculation.

#### 4. Spectroscopic characterisation of desertomycin A (1)

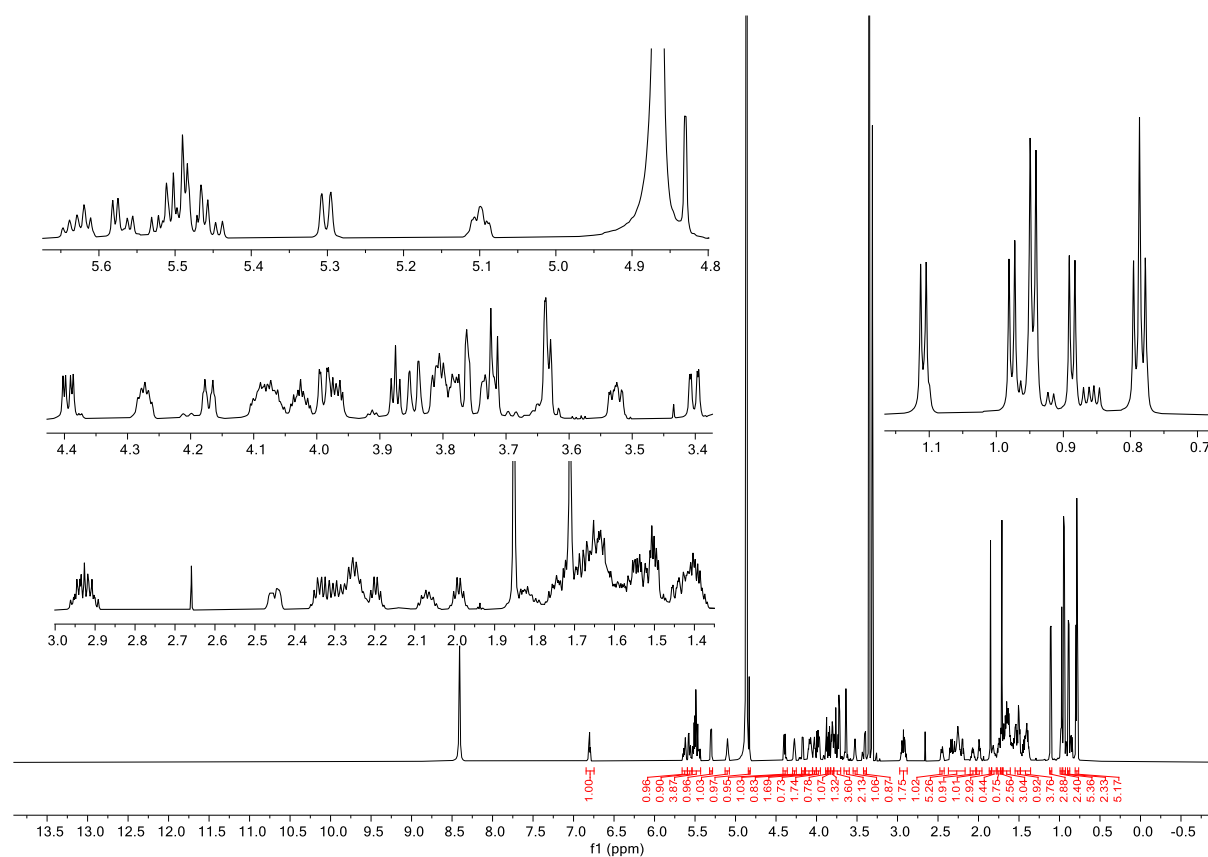

**Figure S2.**  $^1\text{H}$  NMR (800 MHz, methanol- $d_4$ ) spectrum for desertomycin A (1)

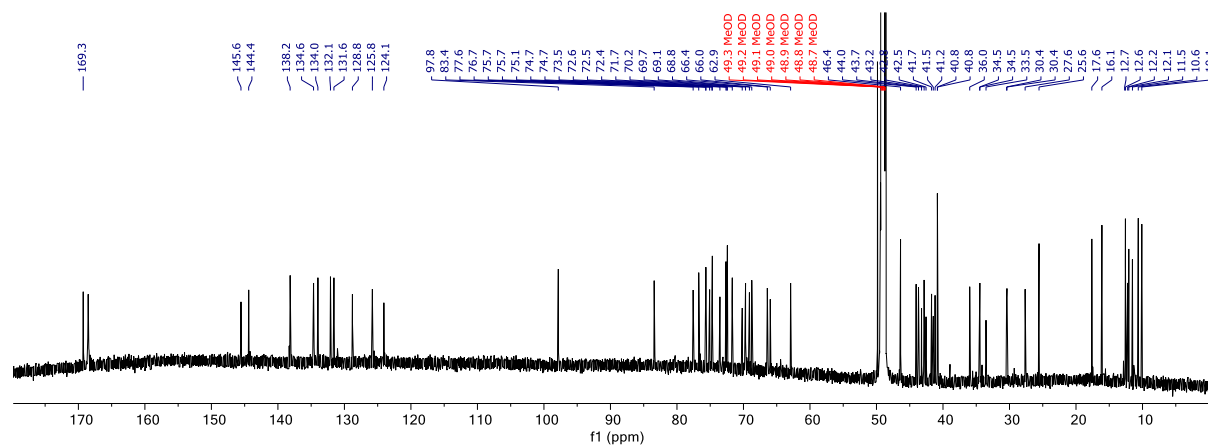

**Figure S3.**  $^{13}\text{C}$  NMR (200 MHz, methanol- $d_4$ ) spectrum for desertomycin A (1)

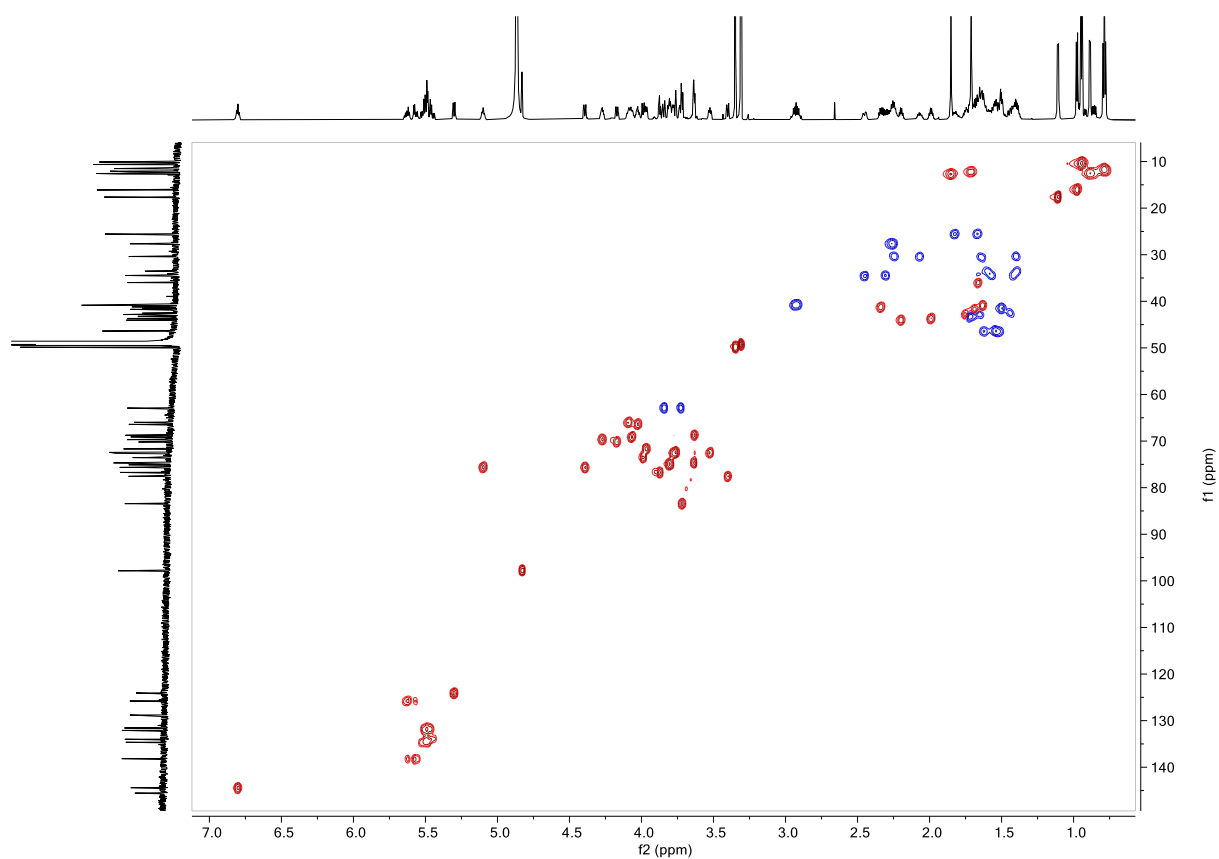

**Figure S4.** 2D NMR HSQC spectrum (methanol-*d*<sub>4</sub>) for desertomycin A (**1**)

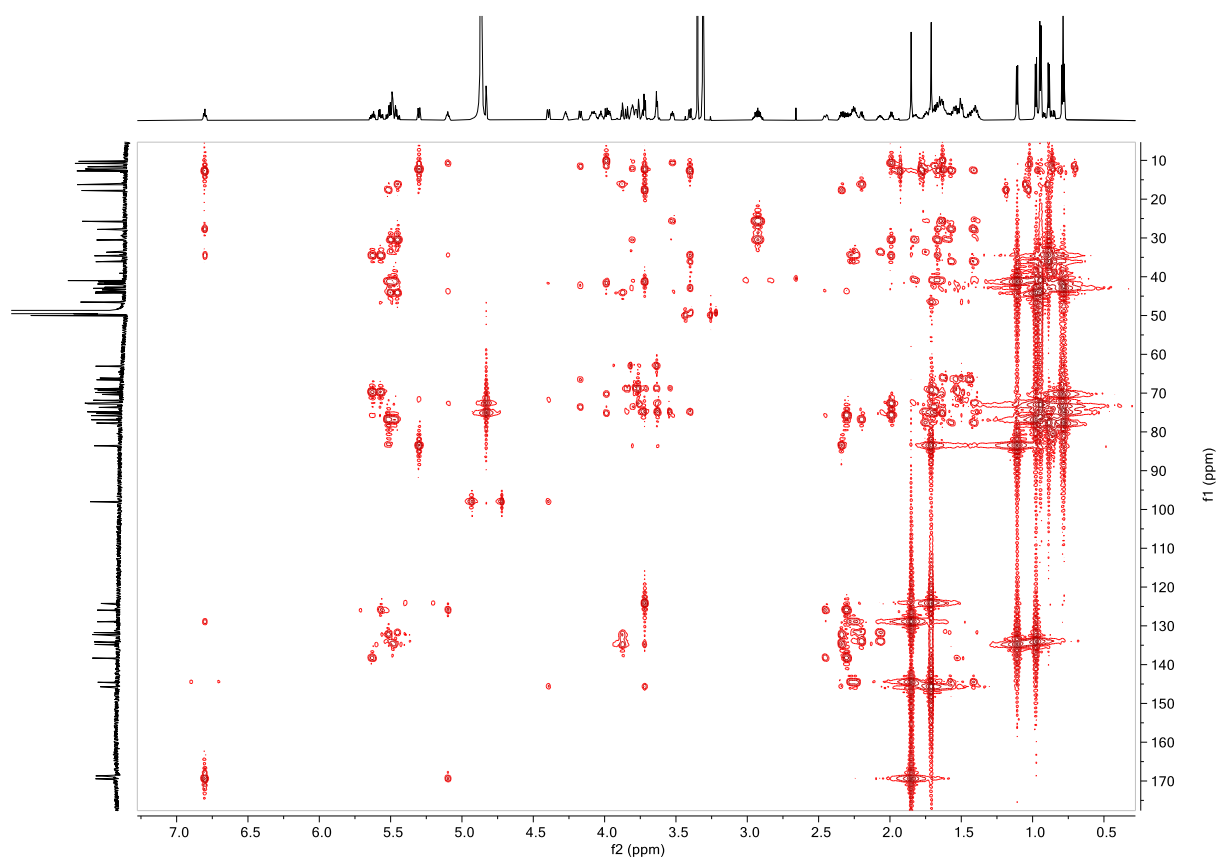

**Figure S5.** 2D NMR HMBC spectrum (methanol-*d*<sub>4</sub>) for desertomycin A (**1**)

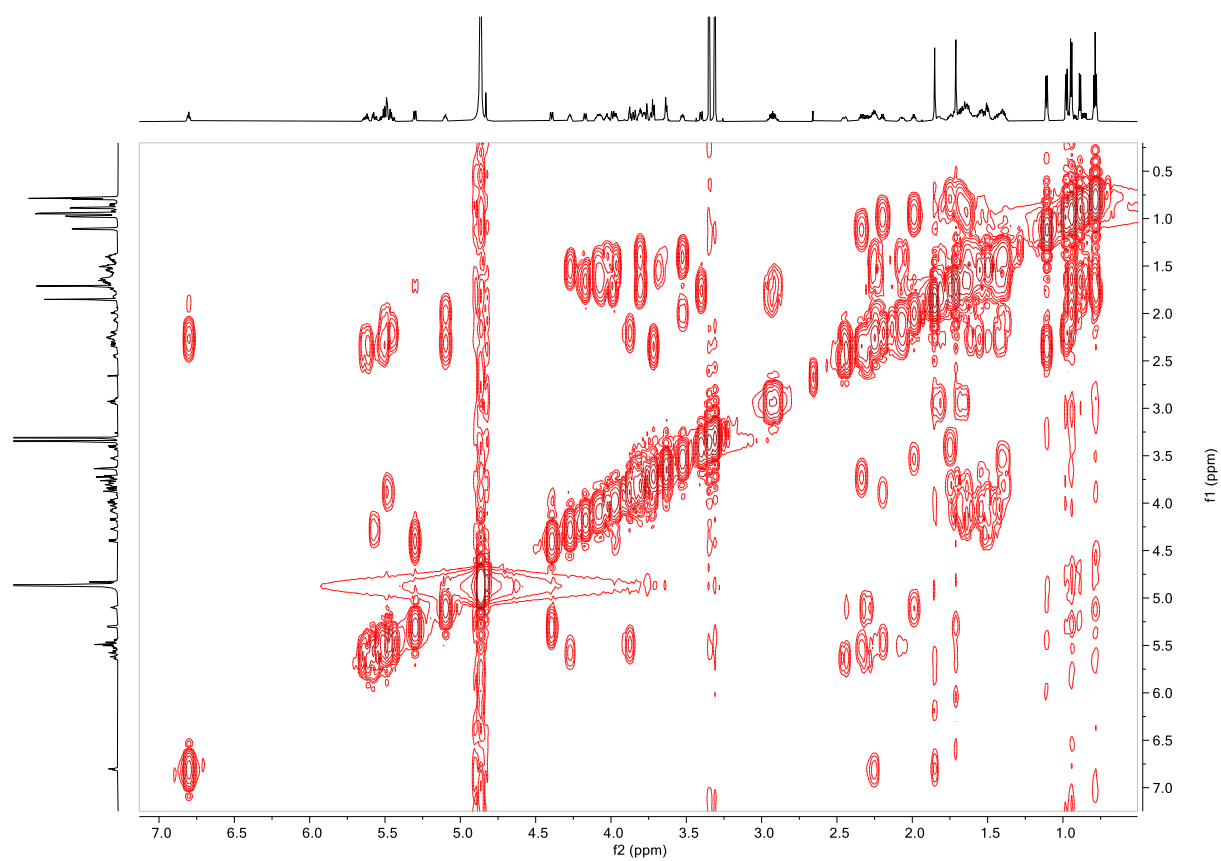

**Figure S6.** 2D NMR COSY spectrum (methanol- $d_4$ ) for desertomycin A (**1**)

**Table S3.** 1D and 2D NMR (800 MHz, methanol-*d*<sub>4</sub>) data for desertomycin A (**1**)

| Pos. | $\delta_{\text{H}}$ , m (J Hz) | $\delta_{\text{C}}$ | COSY          | HMBC               | Pos. | $\delta_{\text{H}}$ , m (J Hz) | $\delta_{\text{C}}$ | COSY         | HMBC           |
|------|--------------------------------|---------------------|---------------|--------------------|------|--------------------------------|---------------------|--------------|----------------|
| 1    | ---                            | 169.3               |               |                    | 33   | 4.17, td (10.0, 2.3)           | 70.2                | 32, 34       |                |
| 2    | ---                            | 128.8               |               |                    | 34   | 1.69 <sup>b</sup>              | 43.2                | 33           |                |
| 3    | 6.80, m                        | 144.4               | 4             | 1, 2, 4, 5         | 35   | 4.02, m                        | 66.5                | 34, 36       |                |
| 4    | 2.26 <sup>a</sup> , m          | 27.6                | 3             | 2, 3, 5, 6         | 36   | 1.53 <sup>g</sup>              | 46.4                | 35, 37       |                |
| 5    | a 1.42, m                      | 34.5                | 4, 6          | 3, 4, 6, 7         | 37   | 4.27, m                        | 69.7                | 36, 37       | 34, 35, 38, 39 |
|      | b 1.57, m                      |                     |               |                    | 38   | 5.58, dd (15.4, 5.5)           | 138.2               | 37, 39       | 36, 37, 39, 40 |
| 6    | 1.67 <sup>b</sup> , m          | 36.0                | 48            |                    | 39   | 5.62, dd (15.4, 6.7, 0.9)      | 125.8               | 38, 40a      | 37, 38, 40, 41 |
| 7    | 3.40, dd (9.6, 1.7)            | 77.5                | 8             |                    | 40   | a 2.30, dd (13.4, 6.7)         | 34.5                | 39, 40b      |                |
| 8    | 1.75, m                        | 42.8                | 49            |                    |      | b 2.45, dd (13.4, 5.3)         |                     | 39, 40b, 41  |                |
| 9    | 3.80 <sup>c</sup>              | 74.7 <sup>k</sup>   | 10a, 10b      |                    | 41   | 5.10, m                        | 75.6 <sup>l</sup>   | 40b, 42      |                |
| 10   | a 1.40 <sup>d</sup>            |                     | 9             |                    | 42   | 1.99, q (6.9)                  | 43.7                | 41, 43, 55   |                |
|      | b 1.60 <sup>e</sup>            |                     | 9             |                    | 43   | 3.52, ddd (9.8, 5.6, 1.9)      | 72.6                | 42, 44a, 44b |                |
| 11   | a 2.07, m                      | 30.40               | 10a, 11b      |                    | 44   | a 1.40 <sup>d</sup>            | 30.44               | 43, 44b, 45  |                |
|      | b 2.24 <sup>a</sup>            |                     | 10a, 10b, 11a |                    |      | b 1.63 <sup>e</sup>            |                     | 43, 44a, 45  |                |
| 12   | 5.49 <sup>f</sup>              | 131.6               | 11a, 11b, 13  | 10, 11, 13, 14     | 45   | a 1.67 <sup>b</sup>            | 25.6                | 44a, 44b, 46 |                |
| 13   | 5.45 <sup>f</sup>              | 134.0               | 12, 14        | 11, 12, 14, 15     |      | b 1.82, m                      |                     |              |                |
| 14   | 2.19, q (6.7)                  | 44.1                |               |                    | 46   | 2.93, m                        | 40.8                | 45           | 44, 45         |
| 15   | 3.87, dd (6.7, 5.5)            | 76.7                | 14            |                    | 47   | 1.85, s                        | 12.7                | 3            | 1, 2, 3        |
| 16   | 5.49 <sup>f</sup>              | 132.1               | 15, 17        | 14, 15, 17, 18     | 48   | 0.88, d (6.8)                  | 12.6                | 6            | 5, 6, 7        |
| 17   | 5.50 <sup>f</sup>              | 134.7               | 16, 18        | 14, 15, 18, 19, 51 | 49   | 0.78, d (6.9)                  | 12.0                | 8            | 7, 8, 9        |
| 18   | 2.34, m                        | 41.2                | 19, 51        |                    | 50   | 0.97, d (6.8)                  | 16.1                | 14           | 13, 14, 15     |
| 19   | 3.72, d (8.5)                  | 83.4                | 18            |                    | 51   | 1.11, d (6.9)                  | 17.6                | 18           | 17, 18, 19     |
| 20   | ---                            | 145.5               |               |                    | 52   | 1.71, s                        | 12.2                |              | 19, 20, 21     |
| 21   | 5.30, d (9.6)                  | 124.1               | 22            |                    | 53   | 0.94 <sup>h</sup> , d (6.9)    | 10.1                | 30           | 29, 30, 31     |
| 22   | 4.39, dd (9.6, 3.5)            | 75.6 <sup>l</sup>   | 21            |                    | 54   | 0.79, d (7.0)                  | 11.5                | 32           | 31, 32, 33     |
| 23   | 3.96, dd (8.3, 3.5)            | 71.7                | 24            |                    | 55   | 0.94 <sup>h</sup> , d (6.9)    | 10.6                | 42           | 41, 42, 43     |
| 24   | 1.49, m                        | 41.5                | 23            |                    | 1'   | 4.83, d (1.5)                  | 97.8                |              | 22, 2', 3', 5' |
| 25   | 4.08, m                        | 66.0                | 26a, 26b      |                    | 2'   | 3.76 <sup>i</sup>              | 72.4*               |              |                |
| 26   | a 1.53 <sup>g</sup>            | 46.4                | 25            |                    | 3'   | 3.76 <sup>i</sup>              | 72.5*               |              |                |
|      | b 1.62 <sup>e</sup>            |                     | 25            |                    | 4'   | 3.63 <sup>j</sup>              | 68.7                |              |                |
| 27   | 4.06, m                        | 69.1                | 26, 28        |                    | 5'   | 3.63 <sup>j</sup>              | 74.7 <sup>k</sup>   |              |                |
| 28   | 1.44, m                        | 42.5                | 27            |                    | 6'   | a 3.72, dd (11.5, 3.6)         | 62.9                |              |                |
| 29   | 3.80 <sup>c</sup>              | 75.1                | 28, 30        |                    |      | b 3.84, dd (11.5, 1.3)         |                     |              |                |
| 30   | 1.63 <sup>e</sup>              | 40.8                | 31, 53        |                    |      |                                |                     |              |                |
| 31   | 3.98, dd (9.5, 1.7)            | 73.5                | 30            |                    |      |                                |                     |              |                |
| 32   | 1.69 <sup>b</sup>              | 41.75               | 54            |                    |      |                                |                     |              |                |

<sup>a-l</sup> overlapping signals within the same superscript letter, \* interchangeable assignments



**Table S4.**  $^{13}\text{C}$  NMR ( $\text{DMSO-}d_6$ ) data comparison of desertomycin A (**1**) with published data [1]

| Pos. | $\delta_c$ , experimental | $\delta_c$ literature | Pos. | $\delta_c$ , experimental | $\delta_c$ literature |
|------|---------------------------|-----------------------|------|---------------------------|-----------------------|
| 1    | 166.5                     | 166.5                 | 32   | 40.5                      | 40.3                  |
| 2    | 127.1                     | 127.1                 | 33   | 66.7                      | 66.7                  |
| 3    | 142.1                     | 142.1                 | 34   | 42.2                      | 41.9                  |
| 4    | 26.1                      | 26.1                  | 35   | 63.7                      | 63.7                  |
| 5    | 33.0                      | 32.5                  | 36   | 46.0                      | 45.9                  |
| 6    | 34.4                      | 34.4                  | 37   | 66.7                      | 66.8                  |
| 7    | 74.6                      | 74.9                  | 38   | 138.0                     | 137.6                 |
| 8    | 41.4                      | 41.4                  | 39   | 122.8                     | 122.9                 |
| 9    | 72.0                      | 72.1                  | 40   | 32.1                      | 32.1                  |
| 10   | 32.5                      | 32.4                  | 41   | 73.6                      | 73.5                  |
| 11   | 29.1                      | 29.0                  | 42   | 41.8                      | 41.7                  |
| 12   | 129.6                     | 129.5                 | 43   | 70.2                      | 69.4                  |
| 13   | 132.6                     | 132.6                 | 44   | 30.0                      | 29.9                  |
| 14   | 42.2                      | 42.1                  | 45   | 25.0*                     | 24.0                  |
| 15   | 74.4                      | 74.4                  | 46   | 39.2                      | 39                    |
| 16   | 131.1                     | 130.9                 | 47   | 12.3                      | 12.0                  |
| 17   | 132.7                     | 132.7                 | 48   | 12.3                      | 12.2                  |
| 18   | 39.2                      | 39.2                  | 49   | 11.2                      | 11.6                  |
| 19   | 80.9                      | 80.9                  | 50   | 15.3                      | 15.3                  |
| 20   | 143.3                     | 143.3                 | 51   | 16.8                      | 16.8                  |
| 21   | 122.3                     | 122.3                 | 52   | 11.6                      | 11.6                  |
| 22   | 73.6                      | 73.6                  | 53   | 9.7                       | 9.7                   |
| 23   | 69.4                      | 69.5                  | 54   | 10.5                      | 11.2                  |
| 24   | 40.9                      | 40.6                  | 55   | 10.4                      | 11.2                  |
| 25   | 63.3                      | 63.3                  | 1'   | 95.9                      | 95.9                  |
| 26   | 45.8                      | 45.7                  | 2'   | 70.5                      | 70.1                  |
| 27   | 66.5                      | 66.4                  | 3'   | 71.0                      | 70.6                  |
| 28   | 42.4                      | 42.1                  | 4'   | 67.2                      | 67.2                  |
| 29   | 72.8                      | 72.8                  | 5'   | 73.5                      | 73.5                  |
| 30   | 39.3                      | 39.3                  | 6'   | 61.3                      | 61.3                  |
| 31   | 70.6                      | 70.6                  |      |                           |                       |

\*signal determined by HSQC

## 5. Spectroscopic characterisation of desertomycin H (2)

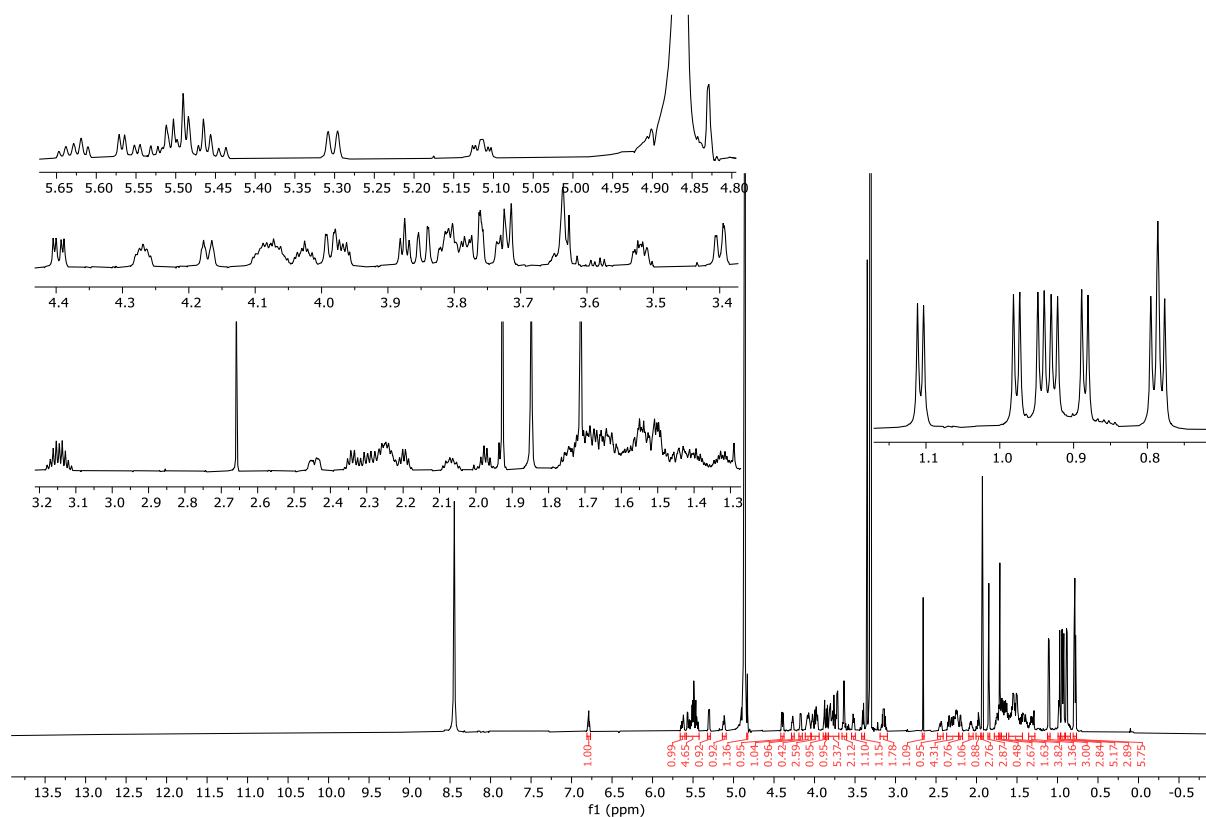

**Figure S7.**  $^1\text{H}$  NMR (800 MHz, methanol- $d_4$ ) spectrum for desertomycin H (2)

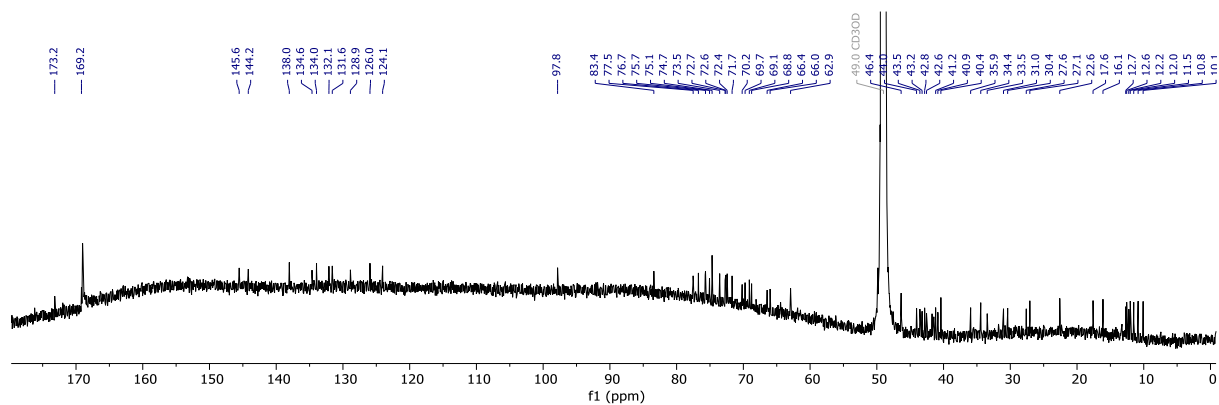

**Figure S8.**  $^{13}\text{C}$  NMR (200 MHz, methanol- $d_4$ ) spectrum for desertomycin H (2)

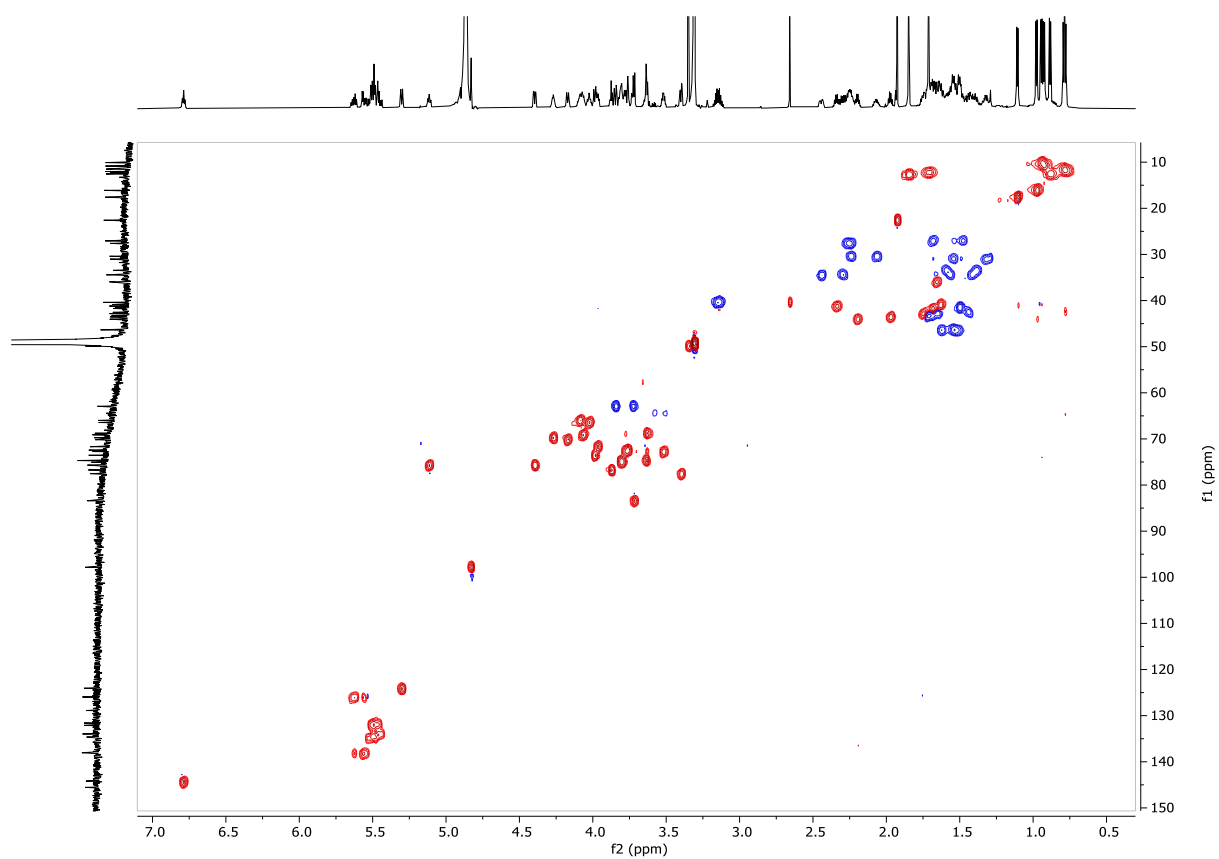

**Figure S9.** 2D NMR HSQC spectrum (methanol- $d_4$ ) for desertomycin H (**2**)

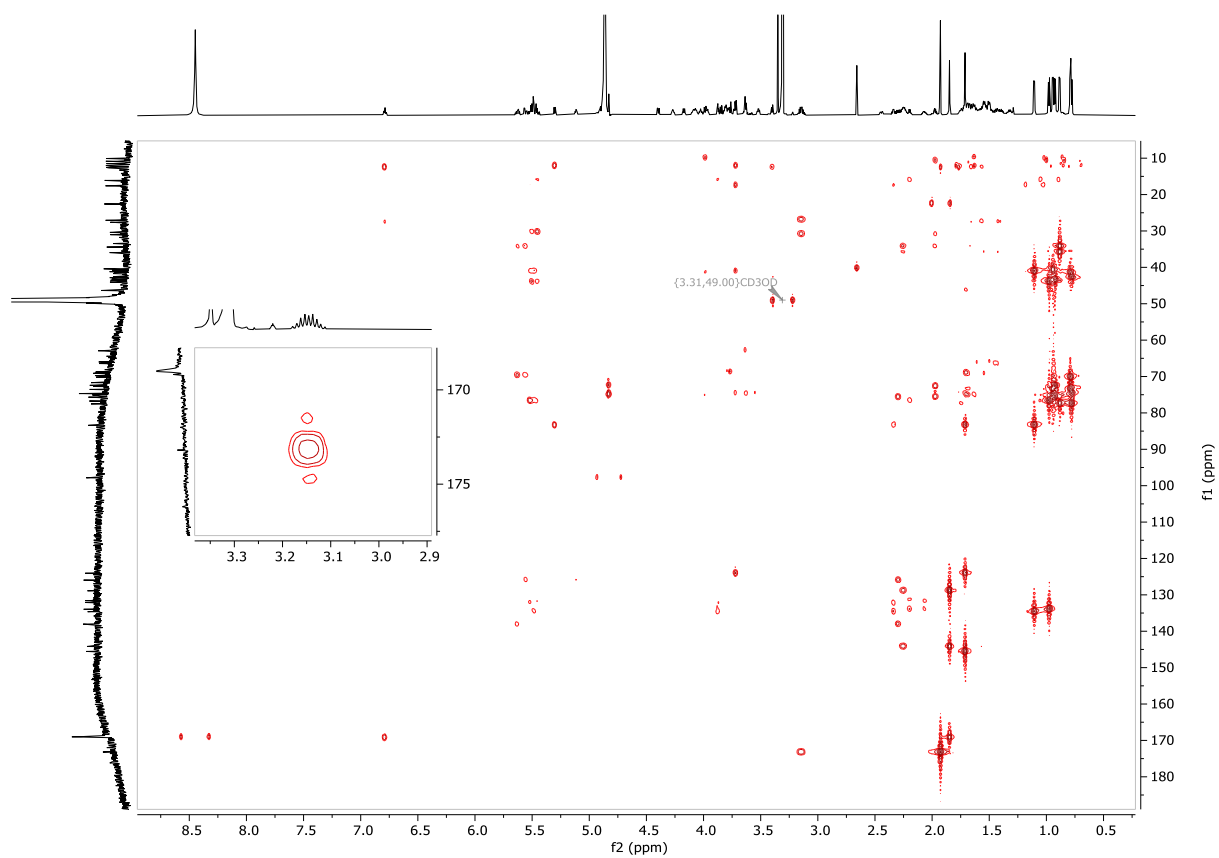

**Figure S10.** 2D NMR HMBC spectrum (methanol- $d_4$ ) for desertomycin H (**2**)

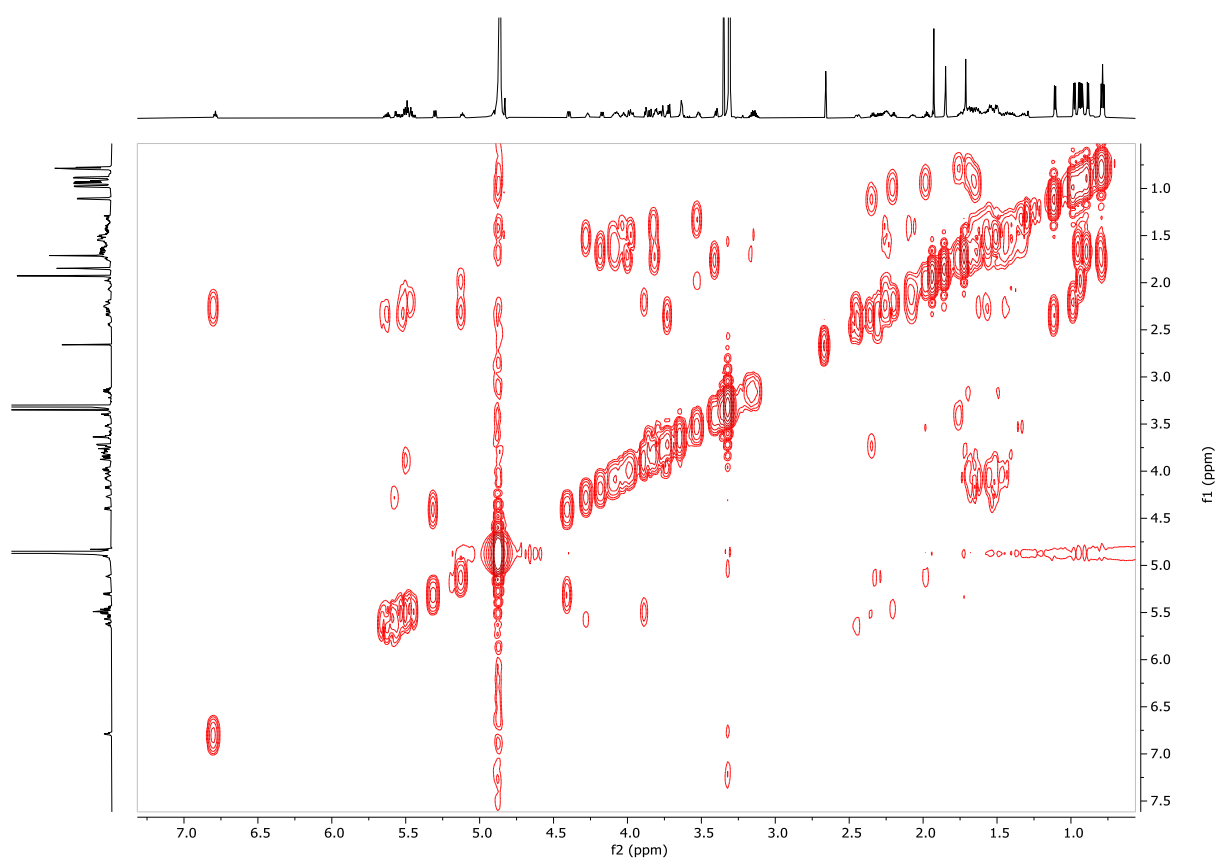

**Figure S11.** 2D NMR COSY spectrum (methanol- $d_4$ ) for desertomycin H (**2**)

**Table S5.** 1D and 2D NMR (800 MHz, methanol-*d*<sub>4</sub>) data for desertomycin H (**2**)

| Pos. | $\delta_{\text{H}}$ , m (J Hz)             | $\delta_{\text{C}}$ | <i>COSY</i>   | <i>HMBC</i>        | Pos.                   | $\delta_{\text{H}}$ , m (J Hz) | $\delta_{\text{C}}$ | <i>COSY</i>  | <i>HMBC</i>                    |
|------|--------------------------------------------|---------------------|---------------|--------------------|------------------------|--------------------------------|---------------------|--------------|--------------------------------|
| 1    | ---                                        | 169.2               |               |                    | 33                     | 4.17, td<br>(10.0, 2.0)        | 70.2                | 32, 34       |                                |
| 2    | ---                                        | 128.9               |               |                    | 34                     | 1.70 <sup>b</sup>              | 43.2                | 33           |                                |
| 3    | 6.79, m                                    | 144.2               | 4             | 1, 2, 4, 5         | 35                     | 4.01, m                        | 66.4                | 34, 36       |                                |
| 4    | 2.25 <sup>a</sup> , m                      | 27.6                | 3             | 2, 3, 5, 6         | 36                     | 1.52 <sup>f</sup>              | 46.3 <sup>l</sup>   | 35, 37       |                                |
| 5    | a 1.41, m<br>b 1.56, m                     | 34.4 <sup>i</sup>   | 4, 6          | 3, 4, 6, 7         | 37                     | 4.27, m                        | 69.7                | 36, 37       | 34, 35, 38, 39                 |
| 6    | 1.65 <sup>b</sup> , m                      | 35.9                | 48            |                    | 38                     | 5.56, dd<br>(15.5, 5.7)        | 138.0               | 37, 39       | 36, 37, 39, 40                 |
| 7    | 3.39, dd (                                 | 77.5                | 8             |                    | 39                     | 5.62, dd<br>(15.0, 7.2)        | 125.9               | 38, 40a      | 37, 38, 40, 41                 |
| 8    | 1.74, m                                    | 42.8                | 49            |                    | 40                     | a 2.29, dd<br>(13.5, 7.2)      | 34.4 <sup>i</sup>   | 39, 40b      |                                |
| 9    | 3.80 <sup>c</sup>                          | 74.7 <sup>j</sup>   | 10a, 10b      |                    | 41                     | b 2.44, dd<br>(13.5, 5.1)      |                     | 39, 40b, 41  |                                |
| 10   | a 1.38<br>b 1.59 <sup>d</sup>              | 33.5                | 9             |                    | 42                     | 5.11, m                        | 75.7 <sup>k</sup>   | 40b, 42      |                                |
|      |                                            |                     | 9             |                    | 43                     | 1.97, q (6.8)                  | 43.5                | 41, 43, 55   |                                |
|      |                                            |                     |               |                    |                        | 3.50, ddd<br>(8.4, 5.5, 1.8)   | 72.7                | 42, 44a, 44b |                                |
| 11   | a 2.07, m<br>b 2.24 <sup>a</sup>           | 30.4                | 10a, 11b      |                    | 44                     | a 1.31                         | 31.0                | 43, 44b, 45  |                                |
| 12   | 5.49 <sup>e</sup>                          | 131.6               | 10a, 10b, 11a |                    |                        | b 1.54 <sup>f</sup>            |                     | 43, 44a, 45  |                                |
| 13   | 5.46 <sup>e</sup>                          | 134.0               | 11a, 11b, 13  | 10, 11, 13, 14     | 45                     | a 1.48 <sup>f</sup>            | 27.1                | 44a, 44b, 46 |                                |
| 14   | 2.19, q (6.6)                              | 44.0                | 12, 14        | 11, 12, 14, 15     |                        | b 1.68 <sup>b</sup>            |                     |              |                                |
| 15   | 3.87, dd (6.6, 5.3)                        | 76.7                | 14            |                    | 46                     | 3.15, m                        | 40.4                | 45           | 44, 45, 46-NHCOCH <sub>3</sub> |
| 16   | 5.46 <sup>e</sup>                          | 132.1               | 15, 17        | 14, 15, 17, 18     | 46-NHCOCH <sub>3</sub> | ---                            | 173.2               |              |                                |
| 17   | 5.49 <sup>e</sup>                          | 134.6               | 16, 18        | 14, 15, 18, 19, 51 | 46-NHCOCH <sub>3</sub> | 1.92, s                        | 22.6                |              | 46, 46-NHCOCH                  |
| 18   | 2.33, m                                    | 41.2                | 19, 51        |                    | 47                     | 1.85, s                        | 12.7                | 3            | 1, 2, 3                        |
| 19   | 3.71, d                                    | 83.4                | 18            |                    | 48                     | 0.88, d (6.8)                  | 12.5                | 6            | 5, 6, 7                        |
| 20   | ---                                        | 145.6               |               |                    | 49                     | 0.78, d (7.5)                  | 12.0                | 8            | 7, 8, 9                        |
| 21   | 5.30, d (9.3)                              | 124.0               | 22            |                    | 50                     | 0.98, d (6.9)                  | 16.1                | 14           | 13, 14, 15                     |
| 22   | 4.39, dd (9.6, 3.6)                        | 75.7 <sup>k</sup>   | 21            |                    | 51                     | 1.11, d (6.6)                  | 17.6                | 18           | 17, 18, 19                     |
| 23   | 3.96, dd (8.0, 3.4)                        | 71.7                | 24            |                    | 52                     | 1.71, s                        | 12.2                |              | 19, 20, 21                     |
| 24   | 1.49, m                                    | 41.46               | 23            |                    | 53                     | 0.94, d (6.9)                  | 10.1                | 30           | 29, 30, 31                     |
| 25   | 4.08, m                                    | 66.0                | 26a, 26b      |                    | 54                     | 0.79, d (7.5)                  | 11.5                | 32           | 31, 32, 33                     |
| 26   | a 1.53 <sup>f</sup><br>b 1.62 <sup>d</sup> | 46.3 <sup>l</sup>   | 25            |                    | 55                     | 0.92, d (6.9)                  | 10.8                | 42           | 41, 42, 43                     |
| 27   | 4.07, m                                    | 69.1                | 26, 28        |                    | 1'                     | 4.83, d (1.3)                  | 97.8                |              | 22, 2', 3', 5'                 |
| 28   | 1.44, m                                    | 42.55               | 27            |                    | 2'                     | 3.77 <sup>g</sup>              | 72.4 <sup>*</sup>   |              |                                |
| 29   | 3.80 <sup>c</sup>                          | 75.1                | 28, 30        |                    | 3'                     | 3.75 <sup>g</sup>              | 72.6 <sup>*</sup>   |              |                                |
| 30   |                                            |                     | 31, 53        |                    | 4'                     | 3.63 <sup>h</sup>              | 68.7                |              |                                |
| 31   | 3.98, dd (9.9, 1.7)                        | 73.5                | 30            |                    | 5'                     | 3.63 <sup>h</sup>              | 74.7 <sup>j</sup>   |              |                                |
| 32   | 1.68 <sup>b</sup>                          | 41.7                | 54            |                    | 6'                     | a 3.72<br>b 3.84               | 62.9                |              |                                |

<sup>a-l</sup> overlapping signals within the same superscript letter, \* interchangeable assignments

## 6. Desertomycin A and desertomycin H bioactivity

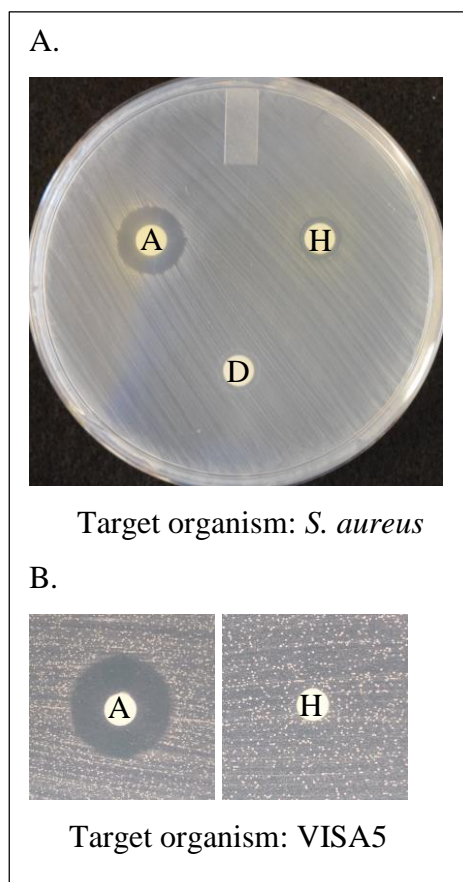

**Figure S12.** Desertomycin A and H bioactivity testing. (A) 30  $\mu$ g of desertomycin A (A) and H (H) were tested for activity using a drug-sensitive strain of *S. aureus* and (B) a vancomycin intermediate-sensitive *S. aureus* (VISA5). DMSO (D) was used as a solvent control. TYME plates were incubated at 37  $^{\circ}$ C and imaged at 24 hours post-inoculation.

## 7. References:

1. Ivanova, V. New Macrolactone of the Desertomycin Family from *Streptomyces Spectabilis*. *Preparative biochemistry & biotechnology* **1997**, 27, 19-38.
